# Supplementary material for: Evolution and expression analysis reveal the potential role of the HD-Zip gene family in regulation of embryo abortion in grapes (Vitis vinifera L.)
Source: BMC Genomics. 2017 Sep 21;18:744. doi: 10.1186/s12864-017-4110-y (PMC5609062; doi:10.1186/s12864-017-4110-y)
Supplement: Supplementary file 7 — Table S4. Synteny regions between grape HD-zip genes. (XLSX 9 kb) [file 12864_2017_4110_MOESM7_ESM.xlsx]

## Sheet: Sheet1
Table S4 Synteny regions between grape HD-zip genes.
Block 1			Block 2			Gene 1	Gene 2	E-value
Chr17	5814755	7784744	Chr1	10067645	15307940	VvHDZ30	VvHDZ4	8e-71
chr13	4546379	6087112	Chr6	2948720	4760340	VvHDZ21	VvHDZ11	0
chr14	28844329	29813645	Chr1	10815152	13910631	VvHDZ24	VvHDZ5	6e-101
chr2	236398	2725052	Chr15	16064252	19083025	VvHDZ7	VvHDZ27	9e-29
chr16	13450982	16162952	chr15	14506625	16138896	VvHDZ26	VvHDZ29	0
chr4	4513024	5171733	chr9	3404650	7445837	VvHDZ8	VvHDZ15	0
chr13	23812858	24096128	chr8	19994166	20724328	VvHDZ22	VvHDZ14	5e-58
chr16	21111941	21960272	chr2	1576333	7511208	VvHDZ28	VvHDZ7	1e-30
chr16	21102338	21926695	chr15	16447701	17355815	VvHDZ28	VvHDZ27	4e-37
